# Supplementary material for: Prevalence and Demographic Correlates of Substance Use among Adults with Mental Illness in Eastern Cape, South Africa: A Cross-Sectional Study
Source: MDPI journal article supplement (doi:10.3390/ijerph18105428), 2021-05-19
Supplement: s1 [file s1]

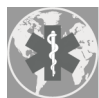

**Table S1.** Common Diagnoses.

|                                                           | Frequencies | Percentages |
|-----------------------------------------------------------|-------------|-------------|
| Schizophrenia                                             | 159         | 40.8        |
| Major depressive symptoms                                 | 72          | 18.5        |
| Cannabis-related                                          | 75          | 19.2        |
| Bipolar                                                   | 69          | 17.7        |
| Alcohol-related disorder                                  | 39          | 10.0        |
| Psychotic disorder                                        | 26          | 6.7         |
| Neurocognitive disorder                                   | 18          | 4.6         |
| Stimulant use disorder                                    | 14          | 3.6         |
| Sedative hypnotic anxiolytic                              | 16          | 4.1         |
| Moderate intellectual disability                          | 15          | 3.8         |
| Antisocial borderline personality disorder                | 10          | 2.6         |
| Mild intellectual disability                              | 10          | 2.6         |
| Generalized anxiety disorder                              | 8           | 2.1         |
| Post-traumatic stress disorder                            | 5           | 1.3         |
| Autism spectrum disorder                                  | 4           | 1.0         |
| Cocaine-related disorder                                  | 3           | 0.8         |
| Other substances                                          | 3           | 0.8         |
| Other specified schizophrenia spectrum                    | 3           | 0.8         |
| Unspecified schizophrenia spectrum and psychotic disorder | 3           | 0.8         |
| Tobacco related                                           | 2           | 0.5         |
| Severe intellectual disability                            | 2           | 0.5         |
| Opioid related disorder                                   | 1           | 0.3         |
| Sleep-wake disorders                                      | 1           | 0.3         |

**Table S2.** Relationship between common mental health disorders and risky alcohol and psychoactive drug use.

| Diagnosis.                                           | Past Year Risky Alcohol Use |                  | Past Year Psychoactive Drug Use |                  |
|------------------------------------------------------|-----------------------------|------------------|---------------------------------|------------------|
|                                                      | N (%)                       | <i>p</i> -Values | N (%)                           | <i>p</i> -Values |
| Schizophrenia Spectrum and other Psychotic Disorders | 34 (18.2)                   | 0.891            | 31 (16.6)                       | 0.668            |
| Depressive Disorders                                 | 8 (11.1)                    | 0.075            | 9 (12.5)                        | 0.222            |
| Bipolar and Related Disorders                        | 11 (15.9)                   | 0.552            | 6 (8.7)                         | 0.035            |
